# Supplementary material
Source: MDPI journal article supplement (https://www.mdpi.com/2673-7167/4/2/8)
Supplement: s1 [file s1]

**Supporting Information for**

**Phosphatidylinositol-4, 5-bisphosphate (PIP<sub>2</sub>)-Dependent**

**Thermoring Basis for Cold-Sensing of the Transient**

**Receptor Potential Melastatin-8 (TRPM8)**

**Biothermometer**

Guangyu Wang 1, 2\*

<sup>1</sup>Department of Physiology and Membrane Biology, University of California at Davis, School of Medicine, Davis, CA 95616, USA

<sup>2</sup>Department of Drug Research and Development, Institute of Biophysical Medico-chemistry, Reno, NV 89523, USA

\* Correspondence: [gary.wang10@gmail.com](mailto:gary.wang10@gmail.com)

**The SI includes:**

**Tables S1, S2, and S3**

**Table S1 Noncovalent interactions along the PIP<sub>2</sub>-dependent minimal gating pathway from Q675 to F1013 in each subunit of closed mTRPV8 with PIP<sub>2</sub> bound at 20 °C (PDB ID, 8E4N)**

| Noncovalent interaction                | Cut-off distance | Linked residues                                                                                                                                                                                                                                                                                                                                                                                                                             |
|----------------------------------------|------------------|---------------------------------------------------------------------------------------------------------------------------------------------------------------------------------------------------------------------------------------------------------------------------------------------------------------------------------------------------------------------------------------------------------------------------------------------|
| Salt bridge                            | 3.2-4 Å          | R688-PIP <sub>2</sub> -R851-PIP <sub>2</sub> - <b>R998-PIP<sub>2</sub>-R688</b> , D781-R1008, D802-R842, <b>E1004-R1008</b>                                                                                                                                                                                                                                                                                                                 |
| H-bond                                 | <3.9 Å           | <b>Q675-R998</b> , <b>N676-R688</b> , Y683-N692-R688, E768-Y772, E782-Y793-Q785, Q785-E1004, R862-N990                                                                                                                                                                                                                                                                                                                                      |
| $\pi$ - $\pi$ interaction              | 2.65–6.5 Å       | <b>W682-Y683-F735</b> , <b>W682-F735</b> , <b>W682-F738</b> , <b>W682-Y1005</b> , F712-W725, F712-Y726, W725-Y726, <b>F738-Y1005</b> , F744-F1013, F748-F752, F748-F839, <b>F752-F809</b> , F752-F832, <b>F752-Y836</b> , <b>F752-F839</b> , F760-F832, <b>H761-H765</b> , <b>Y772-F809</b> , <b>W798-H845</b> , <b>F809-F839</b> , F868-F869, F870-Y981, F874-W877, F874-Y908, W877-F881, F881-Y963, <b>F996-F1000</b> , <b>Y999-F1000</b> |
| cation- $\pi$ interaction              | <6.0 Å           |                                                                                                                                                                                                                                                                                                                                                                                                                                             |
| CH <sub>3</sub> /CH- $\pi$ interaction | 2.65-3.01 Å      | R851-W994, M878-Y908, Y963-T967                                                                                                                                                                                                                                                                                                                                                                                                             |
| Lone pair- $\pi$ interaction           | 3-3.7 Å          | Y793-N799, F815-S827                                                                                                                                                                                                                                                                                                                                                                                                                        |

Note: Bold interactions were conserved in both closed and open states.

**Table S2 Noncovalent interactions along the PIP<sub>2</sub>-dependent minimal gating pathway from Q675 to F1013 in each subunit of closed mTRPM8 with Ca<sup>2+</sup> and PIP<sub>2</sub> and C3 bound at 20 °C (PDB ID, 8E4M)**

| <b>Noncovalent interaction</b>         | <b>Cut-off distance</b> | <b>Linked residues</b>                                                                                                                                                                                                                            |
|----------------------------------------|-------------------------|---------------------------------------------------------------------------------------------------------------------------------------------------------------------------------------------------------------------------------------------------|
| Salt bridge                            | 3.2-4 Å                 | <b>R688-PIP<sub>2</sub>-R998, E782-Ca<sup>2+</sup>-D802, Q785-Ca<sup>2+</sup>-N799, R862-E988, E1004-R1008</b>                                                                                                                                    |
| H-bond                                 |                         | <b>Q675-R998, N676-R688, Y683-N692, R688-N692, Y754-D759, E768-Y772, D802-R842, H818-N821, R688-PIP<sub>2</sub>-S850-PIP<sub>2</sub>-R998, R885-S917, Q886-S902</b>                                                                               |
| $\pi$ - $\pi$ interaction              | 2.65–6.5 Å              | <b>W682-Y683, W682-F735, W682-F738, W682-Y1005, Y683-F735, F712-W725, F712-Y726, W725-Y726, F738-Y1005, F744-F1013, Y745-F748, F748-F839, F752-F809, F752-Y836, F752-F839, H761-H765, W798-H845, F869-F870, F874-W877, F996-F1000, Y999-F1000</b> |
| cation- $\pi$ interaction              | <6.0 Å                  | <b>F760-R816, Y1005-R1008</b>                                                                                                                                                                                                                     |
| CH <sub>3</sub> /CH- $\pi$ interaction | 2.65-3.01 Å             | F748-F752, F760-R829, D781-F1013, D835-F839, D866-Y981, F881-T967, R895-W898-S902, <b>W994-R998</b>                                                                                                                                               |
| Lone pair- $\pi$ interaction           | 3-3.7 Å                 |                                                                                                                                                                                                                                                   |

Note: Bold interactions were conserved in both closed and open states.

**Table S3 Noncovalent interactions along the PIP<sub>2</sub>-dependent minimal gating pathway from Q675 to F1013 in each subunit of open mTRPM8 with Ca<sup>2+</sup> and PIP<sub>2</sub> and chemical agents C3 and AITC bound at 20 °C (PDB ID, 8E4L)**

| Noncovalent interaction                | Cut-off distance | Linked residues                                                                                                                                                                                                                                                                                         |
|----------------------------------------|------------------|---------------------------------------------------------------------------------------------------------------------------------------------------------------------------------------------------------------------------------------------------------------------------------------------------------|
| Salt bridge                            | 3.2-4 Å          | R688-PIP <sub>2</sub> -R851-PIP <sub>2</sub> - <b>R998-PIP<sub>2</sub>-R688, E782-Ca<sup>2+</sup>-D802, Q785-Ca<sup>2+</sup>-N799, E1004-R1008</b>                                                                                                                                                      |
| H-bond                                 | <3.9 Å           | <b>Q675-R998, N676-R688, Y754-D759, E768-Y772, D781-R784, E782-Y793, D802-R842, H845-E1004, R851-D991, D866-T982, W877-T967</b>                                                                                                                                                                         |
| $\pi$ - $\pi$ interaction              | 2.65–6.5 Å       | <b>W682-Y683, W682-F735, W682-F738, W682-Y1005, Y683-F735, F738-Y1005, Y745-F748, F752-F809, F752-Y836, F752-F839, F760-F832, H761-H765, Y772-F809, W786-Y793, W798-H845, F807-Y808, F809-F832, F868-F869, F868-F872, F874-W877, F874-Y908, W877-F881, F881-Y963, F951-W954, F996-F1000, Y999-F1000</b> |
| cation- $\pi$ interaction              | <6.0 Å           | <b>F760-R816</b>                                                                                                                                                                                                                                                                                        |
| CH <sub>3</sub> /CH- $\pi$ interaction | 2.65-3.01 Å      | Y793-N799, F815-S827, R851-W994, F870-L975, F870-F874, <b>W994-R998</b>                                                                                                                                                                                                                                 |
| Lone pair- $\pi$ interaction           | 3-3.7 Å          | F735-S739                                                                                                                                                                                                                                                                                               |

Note: Bold interactions were conserved in both closed and open states.
